# Supplementary material
Source: MDPI journal article supplement (https://www.mdpi.com/1999-4907/14/12/2443)
Supplement: s1 [file s1]

# Supplementary Materials

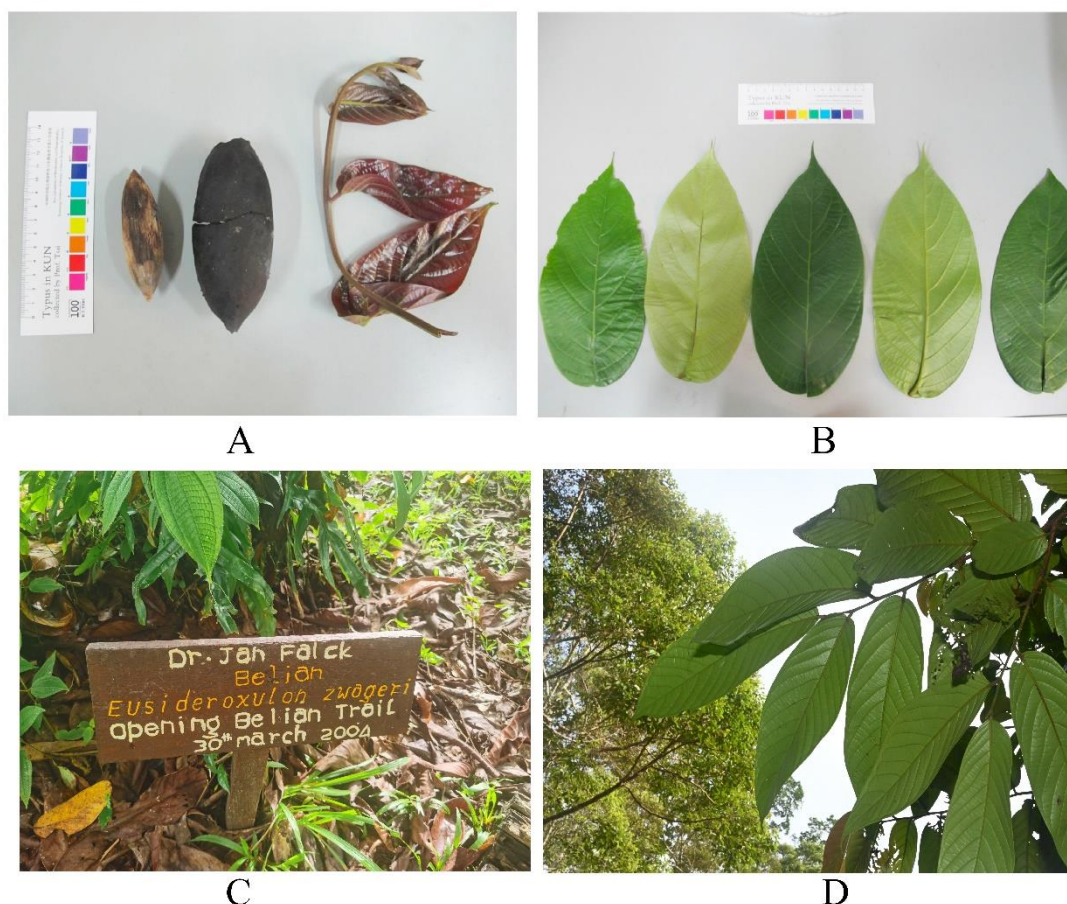

**Figure S1.** Sample images of Belian. (A) Belian seeds and young leaves. (B) Mature leaves of Belian. (A) and (B) were collected from Sulawesi. (C) Collection site marking. (D) Belian III leaves. (C) and (D) were collected from Kalimantan.

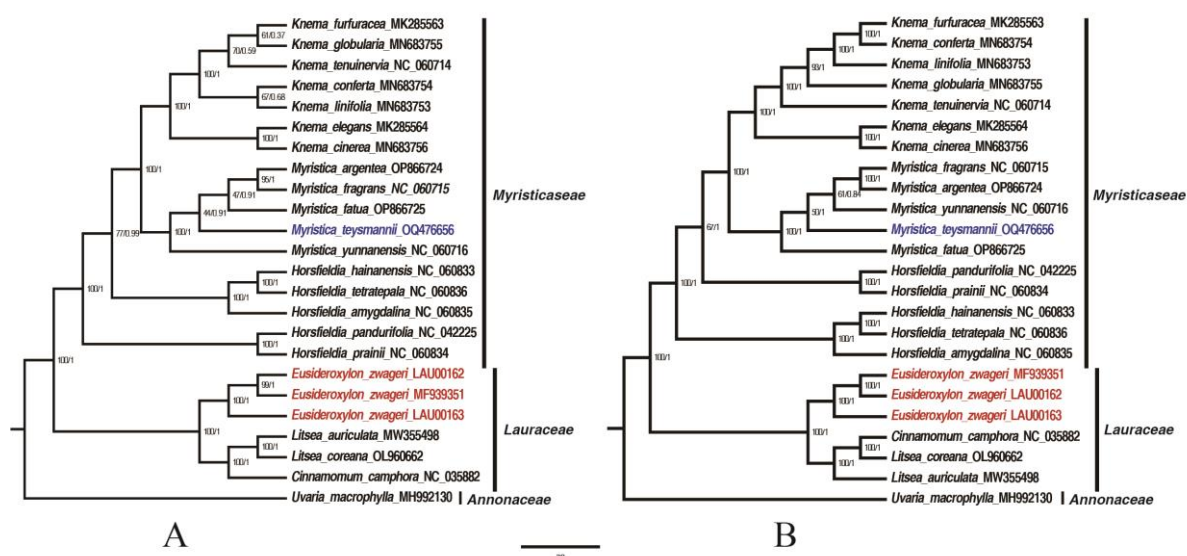

**Figure S2.** The phylogenetic tree based on complete chloroplast sequences and 75 protein-coding genes with ML and BI methods, including 24 species in the Magnoliids. (A) The phylogenetic tree based on complete chloroplast sequences with Maximum Likelihood and Bayesian Inference method, including 24 species in the Magnoliids (Myristicaceae: *Horsfieldia*, *Knema*, *Myristica*, *Endocomia*; Lauraceae: *Cinnamomum*, *Eusideroxylon*, *Litsea*; and Annonaceae: *Uvaria* as the outgroup). (B)

The phylogenetic tree based on 75 protein-coding genes of complete chloroplast sequences with Maximum Likelihood and Bayesian Inference method, including 24 species in the Magnoliids (Myristicaceae: *Horsfieldia*, *Knema*, *Myristica*, *Endocomia*; Lauraceae: *Cinnamomum*, *Eusideroxylon*, *Litsea*; and Annonaceae: *Uvaria* as the outgroup).

**Table S1.** Plastome sequences obtained from NCBI and LCGDB for this study.

| Species                           | Accession | Database |
|-----------------------------------|-----------|----------|
| <i>Aristolochia contorta</i>      | MN132861  | NCBI     |
| <i>Aristolochia littoralis</i>    | OP950686  | NCBI     |
| <i>Aristolochia tubiflora</i>     | OP950692  | NCBI     |
| <i>Artabotrys pilosus</i>         | OK216144  | NCBI     |
| <i>Beilschmiedia percoriacea</i>  | LAU00120  | LCGDB    |
| <i>Beilschmiedia turbinata</i>    | LAU00039  | LCGDB    |
| <i>Calycanthus chinensis</i>      | OP327562  | NCBI     |
| <i>Calycanthus fertilis</i>       | AJ428413  | NCBI     |
| <i>Chimonanthus salicifolius</i>  | MW801118  | NCBI     |
| <i>Chimonanthus zhejiangensis</i> | MW166219  | NCBI     |
| <i>Chloranthus erectus</i>        | MH394412  | NCBI     |
| <i>Chloranthus henryi</i>         | MK922064  | NCBI     |
| <i>Chloranthus japonicus</i>      | KP256024  | NCBI     |
| <i>Chloranthus spicatus</i>       | EF380352  | NCBI     |
| <i>Cryptocarya densiflora</i>     | LAU00050  | LCGDB    |
| <i>Drimys granadensis</i>         | DQ887676  | NCBI     |
| <i>Endiandra dolichocarpa</i>     | LAU00053  | LCGDB    |
| <i>Eusideroxylon zwageri</i>      | LAU00162  | LCGDB    |
| <i>Eusideroxylon zwageri</i>      | LAU00163  | LCGDB    |
| <i>Eusideroxylon zwageri</i>      | MF939351  | NCBI     |
| <i>Gymnotheca chinensis</i>       | MN263889  | NCBI     |
| <i>Hernandia nymphaeifolia</i>    | MG838431  | NCBI     |
| <i>Horsfieldia hainanensis</i>    | MN495959  | NCBI     |
| <i>Horsfieldia tetratopala</i>    | MN495961  | NCBI     |
| <i>Houttuynia cordata</i>         | MN263890  | NCBI     |
| <i>Hypodaphnis zenkeri</i>        | OQ621668  | NCBI     |
| <i>Idiospermum australiense</i>   | MH377056  | NCBI     |
| <i>Illigera celebica</i>          | LAU00199  | LCGDB    |
| <i>Illigera grandiflora</i>       | LAU00198  | LCGDB    |
| <i>Knema cinerea</i>              | MN683756  | NCBI     |
| <i>Knema elegans</i>              | MK285564  | NCBI     |
| <i>Knema linifolia</i>            | MN683753  | NCBI     |
| <i>Liriodendron chinense</i>      | MK887907  | NCBI     |
| <i>Liriodendron tulipifera</i>    | MN990625  | NCBI     |
| <i>Miliusa glochidioides</i>      | OM047203  | NCBI     |
| <i>Myristica argentea</i>         | OP866724  | NCBI     |
| <i>Myristica fatua</i>            | OP866725  | NCBI     |
| <i>Myristica fragrans</i>         | NC 060715 | NCBI     |
| <i>Myristica teysmannii</i>       | OQ476656  | NCBI     |
| <i>Piper betle</i>                | OM717260  | NCBI     |
| <i>Piper boehmeriifolium</i>      | OM717256  | NCBI     |
| <i>Piper bonii</i>                | OM717259  | NCBI     |
| <i>Potameia microphylla</i>       | MT720950  | NCBI     |
| <i>Pseudowintera colorata</i>     | MT555077  | NCBI     |
| <i>Saururus chinensis</i>         | MN263891  | NCBI     |
| <i>Stelechocarpus burahol</i>     | MN253544  | NCBI     |
| <i>Syndiclis chinensis</i>        | LAU00155  | LCGDB    |
| <i>Tasmannia lanceolata</i>       | MT555078  | NCBI     |

Note: LCGDB=Lauraceae Chloroplast Genome Database.

**Table S2.** Genes present in the Belian chloroplast genome.

| Gene funcction        | Group of genes                                         | Name of genes                                                                                                                                                                                                                                                                                                                           |
|-----------------------|--------------------------------------------------------|-----------------------------------------------------------------------------------------------------------------------------------------------------------------------------------------------------------------------------------------------------------------------------------------------------------------------------------------|
| Photosynthesis gene   | Photosystem I                                          | <i>psaA, psaB, psaC, psaI, psaJ</i>                                                                                                                                                                                                                                                                                                     |
|                       | Photosystem II                                         | <i>psbA, psbB, psbC, psbD, psbE, psbF, psbH, psbI, psbJ, psbK, psbL, psbM, psbN, psbT, psbZ, ycf3**</i>                                                                                                                                                                                                                                 |
|                       | Cytochrome b/f complex                                 | <i>petA, petB*, petD*, petG, petL, petN</i>                                                                                                                                                                                                                                                                                             |
|                       | ATP synthase                                           | <i>atpA, atpB, atpE, atpF*, atpH, atpI</i>                                                                                                                                                                                                                                                                                              |
|                       | NADH-dehydrogenase                                     | <i>ndhA*, ndhB* (2), ndhC, ndhD, ndhE, ndhF, ndhG, ndhH, ndhI, ndhJ, ndhK</i>                                                                                                                                                                                                                                                           |
| Self-replication gene | Rubisco Large subunit                                  | <i>rbcL</i>                                                                                                                                                                                                                                                                                                                             |
|                       | RNA polymerase                                         | <i>rpoA, rpoB, rpoC1*, rpoC2</i>                                                                                                                                                                                                                                                                                                        |
|                       | Ribosomal proteins (LSU)                               | <i>rpl2*, rpl14, rpl16*, rpl20, rpl22, rpl23 (2), rpl32, rpl33, rpl36</i>                                                                                                                                                                                                                                                               |
|                       | Ribosomal proteins (SSU)                               | <i>rps2, rps3, rps4, rps7 (2), rps8, rps11, rps12 (2), rps14, rps15, rps16*, rps18, rps19</i>                                                                                                                                                                                                                                           |
|                       | Transfer RNAs                                          | <i>trnA-UGC**(2), trnC-GCA, trnD-GUC, trnE-UUC, trnF-GAA, trnG-GCC, trnG-UCC*, trnH-GUG, trnI-CAU(2), trnI-GAU*(2), trnK-UUU**, trnL-CAA(2), trnL-UAA, trnL-UAG*, trnM-CAU(2), trnN-GUU(2), trnP-UGG, trnQ-UUG, trnR-ACG(2), trnR-UCU, trnS-GCU, trnS-GGA, trnS-UGA, trnT-GGU, trnT-UGU, trnV-GAC(2), trnV-UAC*, trnW-CCA, trnY-GUA</i> |
| Other genes           | Ribosomal RNAs                                         | <i>rrn4.5(2), rrn5(2), rrn16(2), rrn23(2)</i>                                                                                                                                                                                                                                                                                           |
|                       | Subunit of Acetyl-CoA-carbox-ylase                     | <i>accD</i>                                                                                                                                                                                                                                                                                                                             |
|                       | C-type cytochrom synthesis gene                        | <i>ccsA</i>                                                                                                                                                                                                                                                                                                                             |
|                       | Envelop membrane protein                               | <i>cemA</i>                                                                                                                                                                                                                                                                                                                             |
|                       | Protease                                               | <i>clpP**</i>                                                                                                                                                                                                                                                                                                                           |
| Functions unknown     | Translational initiation factor                        | <i>infA</i>                                                                                                                                                                                                                                                                                                                             |
|                       | Maturase                                               | <i>matK</i>                                                                                                                                                                                                                                                                                                                             |
|                       | Hypothetical chloroplast reading frames ( <i>ycf</i> ) | <i>ycf1(2), ycf2(2), ycf4</i>                                                                                                                                                                                                                                                                                                           |

Note: “\*” means gene with one intron; “\*\*” means gene with two introns; (2) means number of copies of multi-copy genes.

**Table S3.** Mutation present in the Belian chloroplast genome.

| Min (original sequence) | Length | Change               | Polymorphism Type         | Amino Acid Change | CDS       | CDS Position | Codon Change | gene  |
|-------------------------|--------|----------------------|---------------------------|-------------------|-----------|--------------|--------------|-------|
| 502                     | 1      | C -> A               | SNP (transversion)        |                   |           |              |              |       |
| 791                     | 1      | A -> G               | SNP (transition)          |                   |           |              |              |       |
| 1538                    | 1      | (T)10 -> (T)9        | Deletion (tandem repeat)  |                   |           |              |              |       |
| 1538                    | 0      | (T)10 -> (T)11       | Insertion (tandem repeat) |                   |           |              |              |       |
| 1779                    | 5      | AAATG                | Deletion                  |                   |           |              |              |       |
| 3449                    | 1      | C -> A               | SNP (transversion)        |                   |           |              |              |       |
| 4000                    | 1      | C -> T               | SNP (transition)          | D -> N            | matK CDS  | 1183         | GAT -> AAT   | matK  |
| 4334                    | 1      | G -> T               | SNP (transversion)        |                   | matK CDS  | 849          | TCC -> TCA   | matK  |
| 5554                    | 1      | C -> A               | SNP (transversion)        |                   |           |              |              |       |
| 5998                    | 1      | A -> C               | SNP (transversion)        |                   |           |              |              |       |
| 6176                    | 1      | G -> T               | SNP (transversion)        |                   |           |              |              |       |
| 6177                    | 1      | G -> T               | SNP (transversion)        |                   |           |              |              |       |
| 6197                    | 1      | (T)10 -> (T)9        | Deletion (tandem repeat)  |                   |           |              |              |       |
| 7007                    | 1      | A -> G               | SNP (transition)          |                   |           |              |              |       |
| 7148                    | 1      | (A)10 -> (A)9        | Deletion (tandem repeat)  |                   |           |              |              |       |
| 7242                    | 1      | -C                   | Deletion                  |                   |           |              |              |       |
| 7398                    | 1      | A -> G               | SNP (transition)          |                   |           |              |              |       |
| 7825                    | 1      | C -> T               | SNP (transition)          | V -> I            | rps16 CDS | 4            | GTA -> ATA   | rps16 |
| 8666                    | 0      | CACAG                | Insertion                 |                   |           |              |              |       |
| 8812                    | 1      | C -> A               | SNP (transversion)        |                   |           |              |              |       |
| 9731                    | 1      | C -> A               | SNP (transversion)        |                   |           |              |              |       |
| 11378                   | 1      | G -> C               | SNP (transversion)        |                   |           |              |              |       |
| 12100                   | 1      | A -> C               | SNP (transversion)        |                   |           |              |              |       |
| 13416                   | 1      | T -> C               | SNP (transition)          |                   | atpA CDS  | 1224         | CAA -> CAG   | atpA  |
| 16067                   | 15     | TTAATATGAATTTC       | Deletion (tandem repeat)  |                   |           |              |              |       |
| 16074                   | 1      | G -> T               | SNP (transversion)        |                   |           |              |              |       |
| 17259                   | 1      | T -> C               | SNP (transition)          |                   |           |              |              |       |
| 17917                   | 1      | C -> A               | SNP (transversion)        | V -> F            | atpI CDS  | 133          | GTT -> TTT   | atpI  |
| 18360                   | 1      | C -> G               | SNP (transversion)        |                   | rps2 CDS  | 618          | GCG -> GCC   | rps2  |
| 19001                   | 0      | (T)10 -> (T)11       | Insertion (tandem repeat) |                   |           |              |              |       |
| 19668                   | 1      | T -> C               | SNP (transition)          | I -> V            | rpoC2 CDS | 3661         | ATT -> GTT   | rpoC2 |
| 22029                   | 1      | G -> T               | SNP (transversion)        | H -> N            | rpoC2 CDS | 1300         | CAT -> AAT   | rpoC2 |
| 25375                   | 1      | T -> G               | SNP (transversion)        |                   |           |              |              |       |
| 25385                   | 1      | C -> T               | SNP (transition)          |                   |           |              |              |       |
| 25596                   | 1      | (T)10 -> (T)9        | Deletion (tandem repeat)  |                   |           |              |              |       |
| 26245                   | 0      | ATAGAA               | Insertion                 |                   |           |              |              |       |
| 26423                   | 1      | T -> C               | SNP (transition)          |                   | rpoB CDS  | 3057         | GGA -> GGG   | rpoB  |
| 27194                   | 1      | T -> G               | SNP (transversion)        |                   | rpoB CDS  | 2286         | GGA -> GGC   | rpoB  |
| 29960                   | 0      | GATAT                | Insertion                 |                   |           |              |              |       |
| 30399                   | 1      | G -> T               | SNP (transversion)        |                   |           |              |              |       |
| 31241                   | 1      | A -> G               | SNP (transition)          |                   |           |              |              |       |
| 31874                   | 1      | T -> G               | SNP (transversion)        |                   |           |              |              |       |
| 31898                   | 0      | TTCATAAA             | Insertion                 |                   |           |              |              |       |
| 32123                   | 1      | C -> G               | SNP (transversion)        |                   |           |              |              |       |
| 32490                   | 1      | A -> C               | SNP (transversion)        |                   |           |              |              |       |
| 32852                   | 1      | A -> C               | SNP (transversion)        |                   |           |              |              |       |
| 32853                   | 1      | A -> C               | SNP (transversion)        |                   |           |              |              |       |
| 32910                   | 1      | C -> T               | SNP (transition)          |                   |           |              |              |       |
| 33016                   | 1      | (A)7 -> (A)6         | Deletion (tandem repeat)  |                   |           |              |              |       |
| 33339                   | 1      | T -> C               | SNP (transition)          |                   |           |              |              |       |
| 34139                   | 0      | (CTATG)2 -> (CTATG)3 | Insertion (tandem repeat) |                   |           |              |              |       |

|        |    |                               |                           |            |           |      |                            |            |
|--------|----|-------------------------------|---------------------------|------------|-----------|------|----------------------------|------------|
| 34429  | 0  | (T)9 -> (T)10                 | Insertion (tandem repeat) |            |           |      |                            |            |
| 35272  | 1  | A -> G                        | SNP (transition)          |            |           |      |                            |            |
| 35299  | 1  | G -> A                        | SNP (transition)          |            |           |      |                            |            |
| 35551  | 1  | A -> G                        | SNP (transition)          |            |           |      |                            |            |
| 38690  | 1  | T -> C                        | SNP (transition)          |            | psbC CDS  | 1287 | TCT -> TCC                 | psbC       |
| 38966  | 7  | TCCCACC -> GGTGGGA            | Microinversion            |            |           |      |                            | psbC-trnS  |
| 39389  | 0  | TTTCAATT                      | Insertion                 |            |           |      |                            |            |
| 40086  | 1  | C -> A                        | SNP (transversion)        |            |           |      |                            |            |
| 44049  | 1  | A -> G                        | SNP (transition)          |            | psaA CDS  | 1254 | ACT -> ACC                 | psaA       |
| 44374  | 1  | C -> T                        | SNP (transition)          | R -> K     | psaA CDS  | 929  | AGG -> AAG                 | psaA       |
| 44382  | 1  | A -> G                        | SNP (transition)          |            | psaA CDS  | 921  | CAT -> CAC                 | psaA       |
| 45273  | 1  | T -> G                        | SNP (transversion)        |            | psaA CDS  | 30   | GTA -> GTC                 | psaA       |
| 47188  | 1  | T -> G                        | SNP (transversion)        |            |           |      |                            |            |
| 47389  | 1  | G -> A                        | SNP (transition)          |            |           |      |                            |            |
| 48103  | 1  | A -> G                        | SNP (transition)          |            |           |      |                            |            |
| 48996  | 1  | (A)8 -> (A)7                  | Deletion (tandem repeat)  |            |           |      |                            |            |
| 48996  | 0  | (A)8 -> (A)9                  | Insertion (tandem repeat) |            |           |      |                            |            |
| 49907  | 1  | G -> A                        | SNP (transition)          |            |           |      |                            |            |
| 50215  | 5  | AACTT                         | Deletion                  |            |           |      |                            |            |
| 50220  | 0  | (A)2 -> (A)3                  | Insertion (tandem repeat) |            |           |      |                            |            |
| 50392  | 0  | (A)9 -> (A)10                 | Insertion (tandem repeat) |            |           |      |                            |            |
| 51498  | 1  | A -> G                        | SNP (transition)          |            |           |      |                            |            |
| 51894  | 1  | G -> A                        | SNP (transition)          |            |           |      |                            |            |
| 51983  | 1  | G -> T                        | SNP (transversion)        |            |           |      |                            |            |
| 52914  | 0  | TATGGATAT                     | Insertion                 |            |           |      |                            |            |
| 53683  | 1  | (T)12 -> (T)11                | Deletion (tandem repeat)  |            |           |      |                            |            |
| 53683  | 0  | (T)12 -> (T)13                | Insertion (tandem repeat) |            |           |      |                            |            |
| 53790  | 1  | T -> G                        | SNP (transversion)        | L -> F     | ndhC CDS  | 294  | TTA -> TTC                 | ndhC       |
| 54302  | 1  | A -> C                        | SNP (transversion)        |            |           |      |                            |            |
| 54410  | 1  | T -> G                        | SNP (transversion)        |            |           |      |                            |            |
| 55159  | 1  | A -> T                        | SNP (transversion)        |            |           |      |                            |            |
| 55394  | 1  | G -> A                        | SNP (transition)          |            |           |      |                            |            |
| 56881  | 1  | T -> C                        | SNP (transition)          |            |           |      |                            |            |
| 56883  | 1  | T -> AC                       | Insertion                 |            |           |      |                            |            |
| 56954  | 1  | (T)10 -> (T)9                 | Deletion (tandem repeat)  |            |           |      |                            |            |
| 57060  | 1  | C -> A                        | SNP (transversion)        |            | atpE CDS  | 399  | TCG -> TCT                 | atpE       |
| 57671  | 1  | C -> A                        | SNP (transversion)        | M -> I     | atpB CDS  | 1281 | ATG -> ATT                 | atpB       |
| 59330  | 1  | A -> C                        | SNP (transversion)        |            |           |      |                            |            |
| 59460  | 1  | A -> G                        | SNP (transition)          |            |           |      |                            |            |
| 59528  | 10 | GATGTATTG                     | Deletion                  |            |           |      |                            |            |
| 60135  | 1  | G -> T                        | SNP (transversion)        |            | rbcL CDS  | 414  | CTG -> CTT                 | rbcL       |
| 60417  | 1  | G -> A                        | SNP (transition)          |            | rbcL CDS  | 696  | ACG -> ACA                 | rbcL       |
| 61296  | 1  | C -> A                        | SNP (transversion)        |            |           |      |                            |            |
| 61692  | 0  | TTTCT                         | Insertion                 |            |           |      |                            |            |
| 61713  | 0  | TATTAG                        | Insertion                 |            |           |      |                            |            |
| 62177  | 1  | G -> A                        | SNP (transition)          | S -> N     | accD CDS  | 338  | AGT -> AAT                 | accD       |
| 62360  | 1  | C -> ACATTTATAGTTA            | Insertion                 | P -> HIYSY | accD CDS  | 521  | CCC -> CAC,ATT,TAT,AGT,TAC | accD       |
| 63603  | 1  | A -> T                        | SNP (transversion)        |            |           |      |                            |            |
| 63850  | 1  | A -> G                        | SNP (transition)          |            |           |      |                            |            |
| 64888  | 1  | C -> G                        | SNP (transversion)        | P -> R     | ycf4 CDS  | 458  | CCC -> CGC                 | ycf4       |
| 65302  | 1  | A -> C                        | SNP (transversion)        |            |           |      |                            |            |
| 66074  | 1  | A -> G                        | SNP (transition)          |            | cemA CDS  | 177  | AGA -> AGG                 | cemA       |
| 68310  | 1  | A -> G                        | SNP (transition)          |            |           |      |                            |            |
| 68311  | 0  | (G)8 -> (G)9                  | Insertion (tandem repeat) |            |           |      |                            |            |
| 68544  | 1  | G -> A                        | SNP (transition)          |            |           |      |                            |            |
| 68852  | 12 | GAATCAGACAAA -> TTT-GTCTGATTC | Microinversion            |            |           |      |                            | petA-psbJ  |
| 70567  | 1  | (A)10 -> (A)9                 | Deletion (tandem repeat)  |            |           |      |                            |            |
| 71578  | 5  | CCGAT                         | Deletion                  |            |           |      |                            |            |
| 72527  | 1  | C -> A                        | SNP (transversion)        |            |           |      |                            |            |
| 72861  | 1  | G -> A                        | SNP (transition)          |            | rpl33 CDS | 189  | GAG -> GAA                 | rpl33      |
| 73321  | 1  | A -> C                        | SNP (transversion)        |            |           |      |                            |            |
| 75509  | 1  | (T)13 -> (T)12                | Deletion (tandem repeat)  |            |           |      |                            |            |
| 75510  | 1  | (T)13 -> (T)12                | Deletion (tandem repeat)  |            |           |      |                            |            |
| 75672  | 1  | (A)9 -> (A)8                  | Deletion (tandem repeat)  |            |           |      |                            |            |
| 76659  | 1  | G -> A                        | SNP (transition)          |            |           |      |                            |            |
| 77290  | 1  | A -> C                        | SNP (transversion)        |            |           |      |                            |            |
| 77647  | 1  | A -> G                        | SNP (transition)          | E -> G     | psbB CDS  | 248  | GAA -> GGA                 | psbB       |
| 79116  | 1  | G -> A                        | SNP (transition)          | A -> T     | psbT CDS  | 7    | GCA -> ACA                 | psbT       |
| 79731  | 1  | G -> A                        | SNP (transition)          | S -> N     | psbH CDS  | 218  | AGT -> AAT                 | psbH       |
| 80042  | 1  | C -> A                        | SNP (transversion)        |            |           |      |                            |            |
| 80477  | 1  | C -> T                        | SNP (transition)          |            |           |      |                            |            |
| 82038  | 1  | C -> A                        | SNP (transversion)        |            |           |      |                            |            |
| 84749  | 1  | T -> G                        | SNP (transversion)        |            | infA CDS  | 183  | TCA -> TCC                 | infA       |
| 85919  | 1  | C -> A                        | SNP (transversion)        | R -> L     | rpl14 CDS | 92   | CGA -> CTA                 | rpl14      |
| 86177  | 2  | GA -> TC                      | Microinversion            | S -> E     | rpl16 CDS | 355  | TCA -> GAA                 | rpl16      |
| 87465  | 1  | (T)14 -> (T)13                | Deletion (tandem repeat)  |            |           |      |                            |            |
| 87593  | 0  | (TT)7 -> (TT)8                | Insertion (tandem repeat) |            |           |      |                            |            |
| 87593  | 0  | (T)14 -> (T)15                | Insertion (tandem repeat) |            |           |      |                            |            |
| 88786  | 1  | C -> T                        | SNP (transition)          | R -> K     | rpl22 CDS | 8    | AGG -> AAG                 | rpl22      |
| 91078  | 6  | ATCGAT                        | Deletion                  | RSI -> S   | ycf2 CDS  | 1275 | AGA, TCG, ATT -> AGT       | ycf2       |
| 92734  | 1  | T -> G                        | SNP (transversion)        | D -> E     | ycf2 CDS  | 2931 | GAT -> GAG                 | ycf2       |
| 93606  | 1  | C -> A                        | SNP (transversion)        | P -> Q     | ycf2 CDS  | 3803 | CCA -> CAA                 | ycf2       |
| 95656  | 1  | C -> A                        | SNP (transversion)        | F -> L     | ycf2 CDS  | 5853 | TTC -> TTA                 | ycf2       |
| 96970  | 5  | AAGAC                         | Deletion                  |            |           |      |                            |            |
| 114060 | 1  | C -> A                        | SNP (transversion)        | L -> F     | ndhF CDS  | 2220 | TTG -> TTT                 | ndhF       |
| 114074 | 1  | T -> G                        | SNP (transversion)        | I -> L     | ndhF CDS  | 2206 | ATA -> CTA                 | ndhF       |
| 115152 | 1  | A -> C                        | SNP (transversion)        | D -> E     | ndhF CDS  | 1128 | GAT -> GAG                 | ndhF       |
| 116340 | 1  | T -> C                        | SNP (transition)          |            |           |      |                            |            |
| 116376 | 1  | G -> T                        | SNP (transversion)        |            |           |      |                            |            |
| 116395 | 1  | A -> C                        | SNP (transversion)        |            |           |      |                            |            |
| 116440 | 1  | (A)11 -> (A)10                | Deletion (tandem repeat)  |            |           |      |                            |            |
| 117212 | 2  | (AA)5 -> (AA)4                | Deletion (tandem repeat)  |            |           |      |                            |            |
| 117212 | 0  | (A)10 -> (A)11                | Insertion (tandem repeat) |            |           |      |                            |            |
| 117337 | 1  | C -> T                        | SNP (transition)          |            |           |      |                            |            |
| 117731 | 3  | TTC -> GAA                    | Microinversion            |            |           |      |                            | rrn5S-trnR |
| 117768 | 0  | (T)10 -> (T)11                | Insertion (tandem repeat) |            |           |      |                            |            |
| 118156 | 1  | C -> T                        | SNP (transition)          |            |           |      |                            |            |
| 118175 | 1  | G -> T                        | SNP (transversion)        |            |           |      |                            |            |
| 118447 | 1  | (A)14 -> (A)13                | Deletion (tandem repeat)  |            |           |      |                            |            |
| 118448 | 1  | (A)14 -> (A)13                | Deletion (tandem repeat)  |            |           |      |                            |            |
| 118556 | 0  | ATGAC                         | Insertion                 |            |           |      |                            |            |
| 119104 | 1  | C -> A                        | SNP (transversion)        | F -> L     | ccsA CDS  | 225  | TTC -> TTA                 | ccsA       |

|        |   |                |                           |          |           |      |                      |       |           |
|--------|---|----------------|---------------------------|----------|-----------|------|----------------------|-------|-----------|
| 119884 | 5 | CTACT -> AGTAG | Microinversion            |          |           |      |                      |       | ccsA-ndhD |
| 121968 | 1 | T -> G         | SNP (transversion)        |          |           |      |                      |       |           |
| 123325 | 0 | (T)9 -> (T)10  | Insertion (tandem repeat) |          |           |      |                      |       |           |
| 125016 | 1 | G -> T         | SNP (transversion)        |          |           |      |                      |       |           |
| 125508 | 0 | T              | Insertion                 |          |           |      |                      |       |           |
| 125912 | 1 | C -> T         | SNP (transition)          |          | ndhA CDS  | 456  | TCG -> TCA           | ndhA  |           |
| 127851 | 1 | T -> C         | SNP (transition)          | I -> V   | rps15 CDS | 70   | ATA -> GTA           | rps15 |           |
| 128484 | 1 | G -> T         | SNP (transversion)        | P -> Q   | ycf1 CDS  | 4700 | CCA -> CAA           | ycf1  |           |
| 129296 | 3 | AAA -> TTT     | Microinversion            | F -> K   | ycf1 CDS  | 3886 | TTT -> AAA           | ycf1  |           |
| 129657 | 1 | G -> C         | SNP (transversion)        | T -> R   | ycf1 CDS  | 3527 | ACA -> AGA           | ycf1  |           |
| 132180 | 1 | C -> T         | SNP (transition)          | S -> N   | ycf1 CDS  | 1004 | AGT -> AAT           | ycf1  |           |
| 132644 | 1 | T -> C         | SNP (transition)          | I -> M   | ycf1 CDS  | 540  | ATA -> ATG           | ycf1  |           |
| 149751 | 5 | GTCTT          | Deletion                  |          |           |      |                      |       |           |
| 151069 | 1 | G -> T         | SNP (transversion)        | F -> L   | ycf2 CDS  | 5853 | TTC -> TTA           | ycf2  |           |
| 153119 | 1 | G -> T         | SNP (transversion)        | P -> Q   | ycf2 CDS  | 3803 | CCA -> CAA           | ycf2  |           |
| 153991 | 1 | A -> C         | SNP (transversion)        | D -> E   | ycf2 CDS  | 2931 | GAT -> GAG           | ycf2  |           |
| 155642 | 6 | ATCGAT         | Deletion                  | RSI -> S | ycf2 CDS  | 1275 | AGA, TCG, ATT -> AGT | ycf2  |           |
